# Supplementary figures and images for: JNK phosphorylates Yes-associated protein (YAP) to regulate apoptosis
Source: PubMed Central journal article supplement — Cell Death Dis. 2010 Feb 18;1(2):e29–. doi: 10.1038/cddis.2010.7 (PMC3032333; doi:10.1038/cddis.2010.7), 2010-02-18

# Supplementary Figure 1

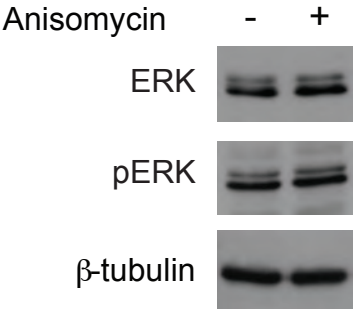

Supplement: cddis20107x1.pdf [file cddis20107x1.pdf]

## Supplementary Figure 2

**a**

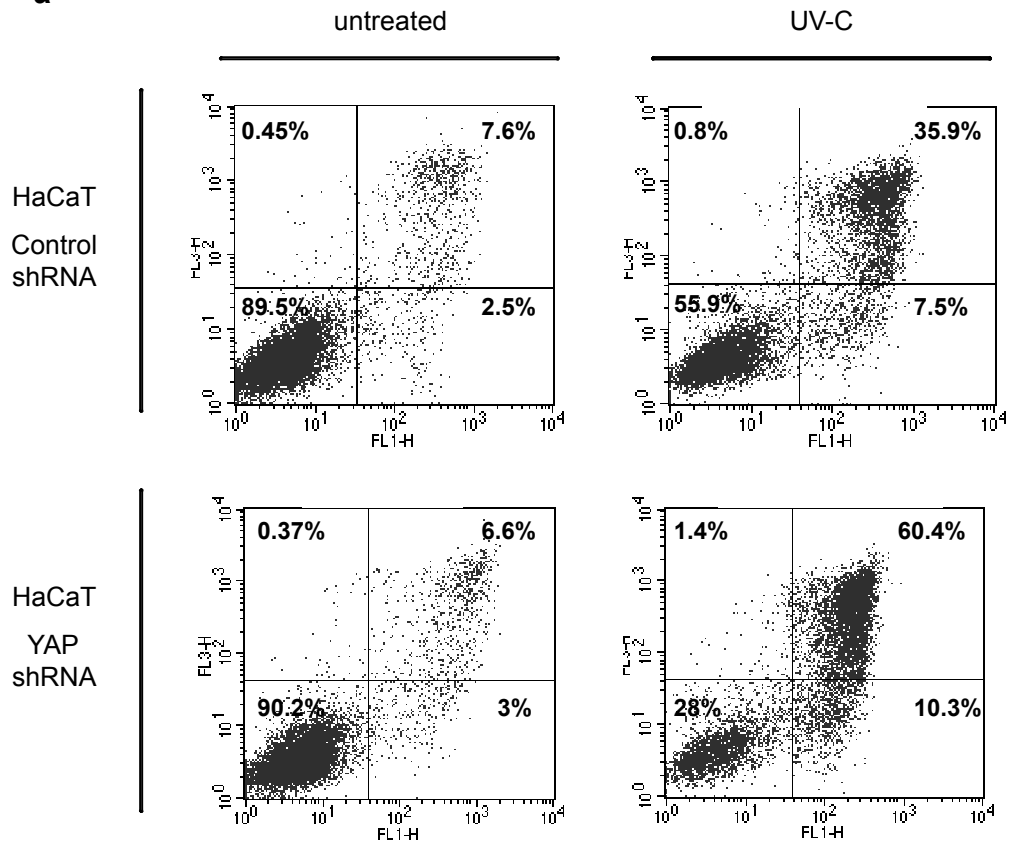

**b**

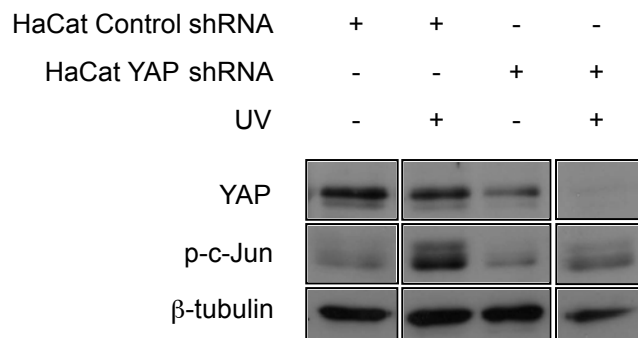

Supplement: cddis20107x2.pdf [file cddis20107x2.pdf]
